# Supplementary material for: Adiponectin and adiponectin receptor 1 overexpression enhance inflammatory bowel disease
Source: PubMed Central journal article supplement (PMC5851065; doi:10.1186/s12929-018-0419-3), 2018-03-14
Supplement: 12929_2018_419_MOESM1_ESM.pdf [file 12929_2018_419_MOESM1_ESM.pdf]

**Supplementary Table 1. Primer sets for quantitative real-time PCR**

|                                      | <b>Primer sequence</b>       |
|--------------------------------------|------------------------------|
| mouse-AdipoR1<br>(NM_001306069)      | 5' CCAGGAAGAAACCACCGGA 3'    |
|                                      | 5' GAAATCAGGAAGGCTGCCAAG 3'  |
| mouse- $\beta$ -actin<br>(NM_007393) | 5' TGTTACCAACTGGGACGACA 3'   |
|                                      | 5' CTTTTCACGGTTGGCCTTAG 3'   |
| mouse-CXCL1<br>(NM_008176.3)         | 5' GGTGTCCCCAAGTAACGGAG 3'   |
|                                      | 5' TTGTCAGAAGCCAGCGTTCA 3'   |
| mouse-CXCL2<br>(NM_009140)           | 5' GCCCAGACAGAAGTCATAGCC 3'  |
|                                      | 5' TTCTTCCGTTGAGGGACAGC 3'   |
| mouse-CXCL5<br>(NM_009141)           | 5' GCATCTAGCTGAAGCTGCC 3'    |
|                                      | 5' CTATGACTTCCACCGTAGGGC 3'  |
| mouse-CXCL15<br>(NM_0011339.2)       | 5' CTAGGCATCTTCGTCCGTCC 3'   |
|                                      | 5' TTCACCCATGGAGCATCAGG 3'   |
| human-cox2<br>(NM_000963)            | 5' TGAGCATCTACGGTTTGCTG 3'   |
|                                      | 5' TGCTTGTCTGGAACAACCTGC 3'  |
| human-TNF- $\alpha$<br>(NM_000594)   | 5' AGCCTCTTCTCCTTCCTGAT 3'   |
|                                      | 5' AAGATGATCTGACTGCCTGG 3'   |
| human-IL-8<br>(NM_000584)            | 5' CCAGGAAGAAACCACCGGA 3'    |
|                                      | 5' GAAATCAGGAAGGCTGCCAAG 3'  |
| human-IL-6<br>(NM_000600)            | 5' TGGAGATGTCTGAGGCTCATTC 3' |
|                                      | 5' GAAGGCAACTGGACCGAAGG 3'   |
| human- $\beta$ -actin<br>(NM_01101)  | 5' GAAGATCAAGATCATTGCTCCT 3' |
|                                      | 5' CTAAGTCATAGTCCGCCTAGAA 3' |

Primers were designed using the Primer-BLAST tool of National Center for Biotechnology Information (NCBI). Each primer sequence was confirmed by aligning its reference sequence in the NCBI database.
