# Supplementary material for: Adiponectin and adiponectin receptor 1 overexpression enhance inflammatory bowel disease
Source: PubMed Central journal article supplement (PMC5851065; doi:10.1186/s12929-018-0419-3), 2018-03-14
Supplement: 12929_2018_419_MOESM2_ESM.pdf [file 12929_2018_419_MOESM2_ESM.pdf]

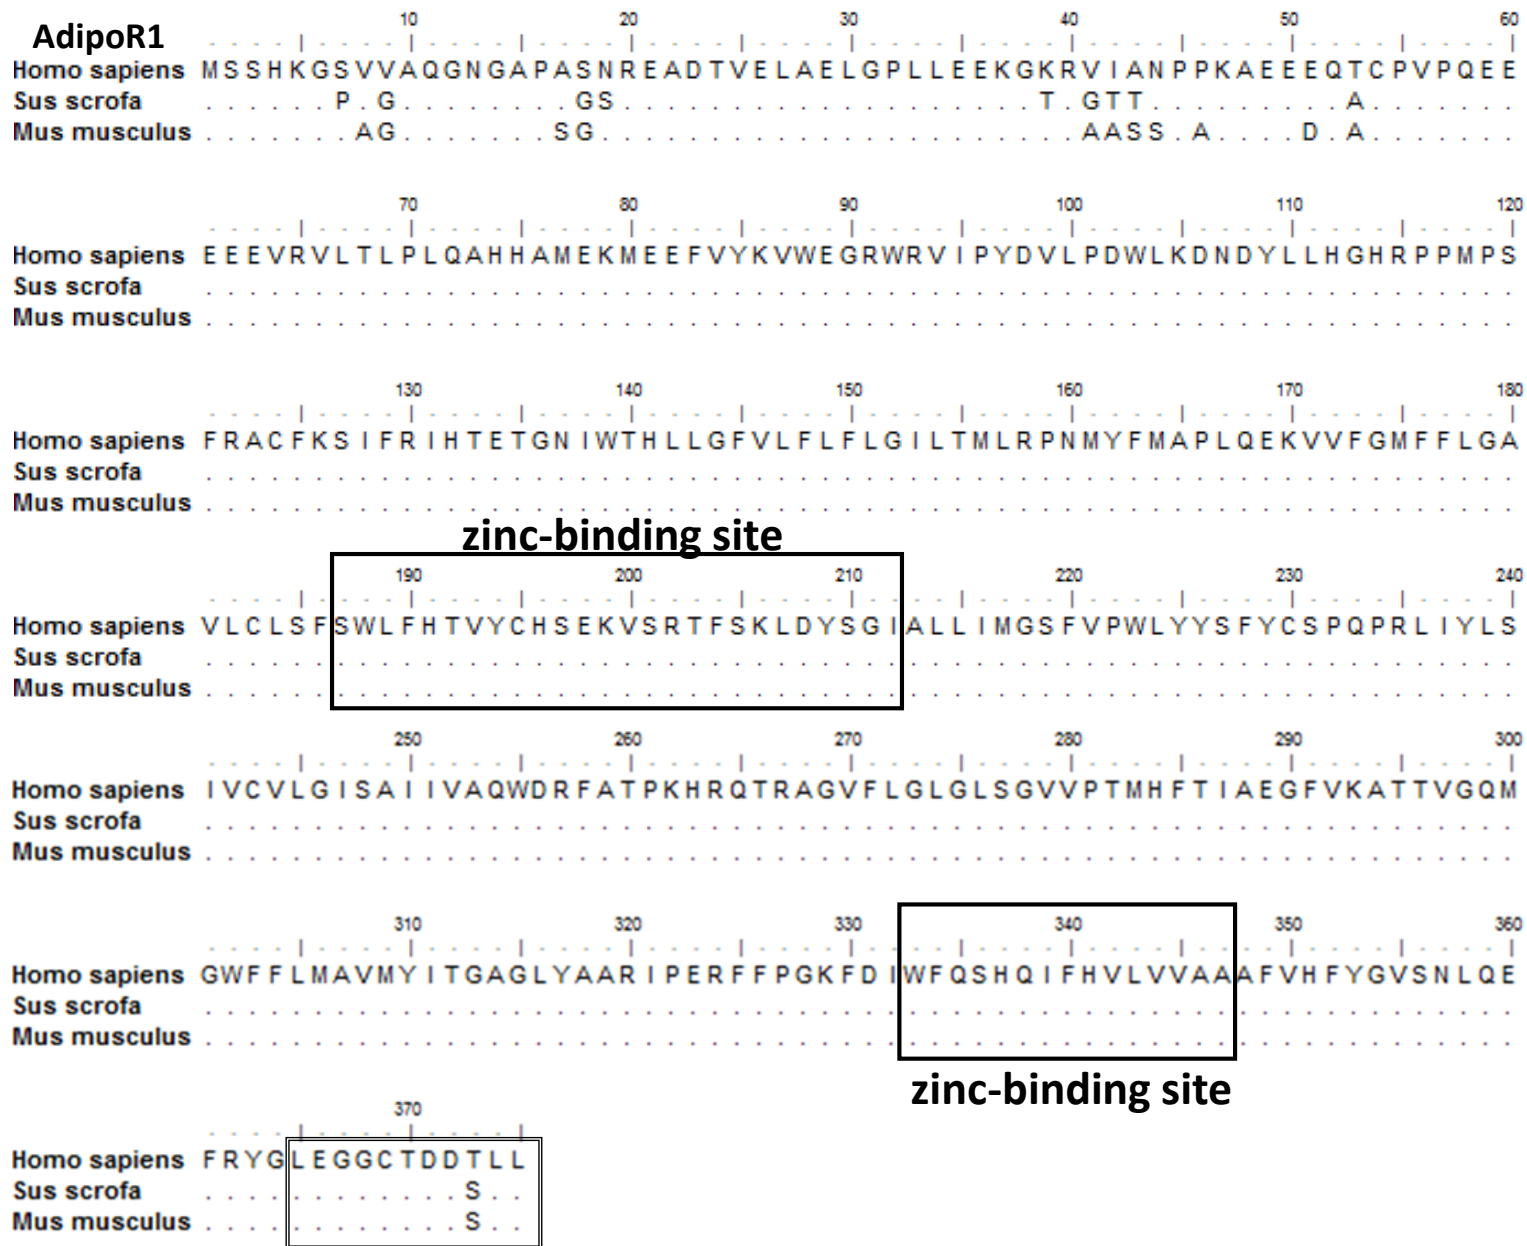

**CTR**

**Supplementary Figure 1**
